# Supplementary material for: Evidence for preferential copackaging of Moloney murine leukemia virus genomic RNAs transcribed in the same chromosomal site
Source: Springer Nature journal article supplement (doi:10.1186/1742-4690-2-3), 2005-01-18
Supplement: 12977_2004_49_MOESM2_ESM.pdf [file 12977_2004_49_MOESM2_ESM.pdf]

**pDΔpbsSVpuro**

**pDΔpbsSVpuro + pDHEneo  
or pDΔpSVpuro**

**Transfect**

**Cotransfect**

**Puro<sup>R</sup> helper cell clones**

**Transfect pDHEneo**

**Neo<sup>R</sup>Puro<sup>R</sup> helper cell clones**

**Neo<sup>R</sup>Puro<sup>R</sup> helper cell clones**

**Harvest virus  
Infect NIH3T3 cells**

**Select for puromycin or G418**

**Determine virus titers and recombination frequencies**
