# Supplementary figures and images for: Evidence for preferential copackaging of Moloney murine leukemia virus genomic RNAs transcribed in the same chromosomal site
Source: Springer Nature journal article supplement (doi:10.1186/1742-4690-2-3), 2005-01-18

**pDHEneo**

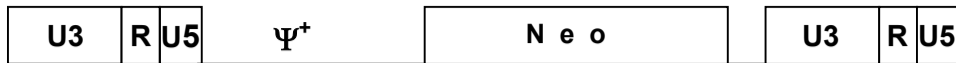

**pD $\Delta$ pbsSVpuro**

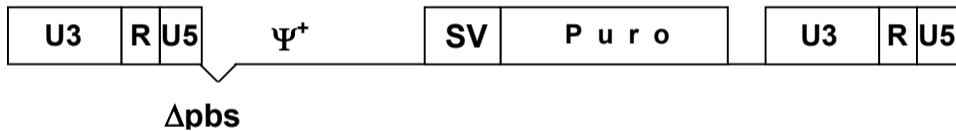

**pD $\Delta$ pSVpuro**

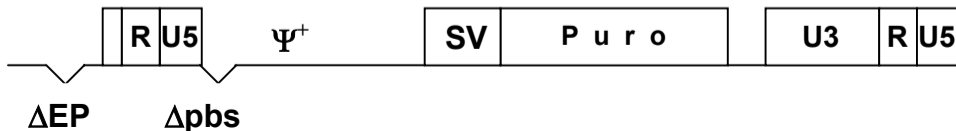

Supplement: 12977_2004_49_MOESM1_ESM.pdf [file 12977_2004_49_MOESM1_ESM.pdf]

**A.**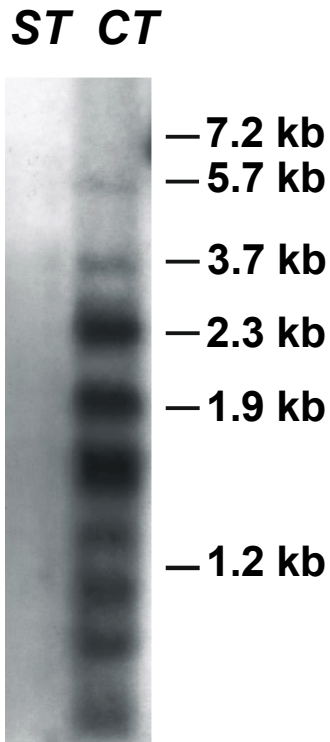**B.**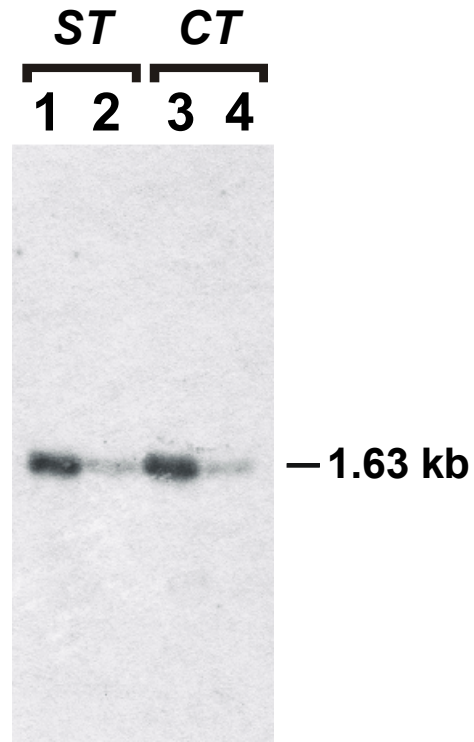

Supplement: 12977_2004_49_MOESM3_ESM.pdf [file 12977_2004_49_MOESM3_ESM.pdf]

**A.****pD $\Delta$ pbsSVpuro**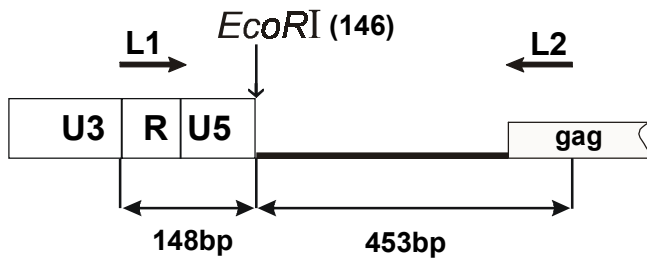**pDHEneo**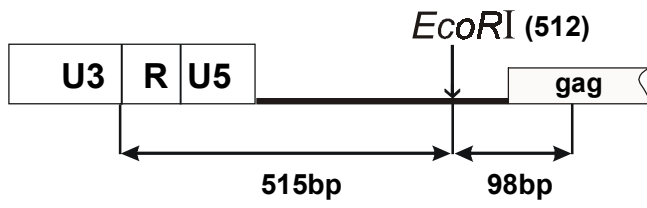**B.**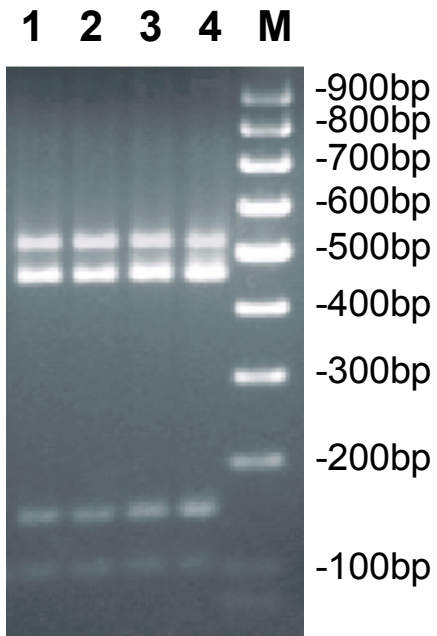

Supplement: 12977_2004_49_MOESM4_ESM.pdf [file 12977_2004_49_MOESM4_ESM.pdf]
